# Supplementary material
Source: publisher figshare collection journal article supplement (https://springernature.figshare.com/ndownloader/files/39322388)

zhuguangshan 290 1 D:\data\jzj\4mm

<sup>13</sup>C CP MAS TOSS-4mm-8KHz-AVANCE NEO

sample: 20230201-zhangcheng-2

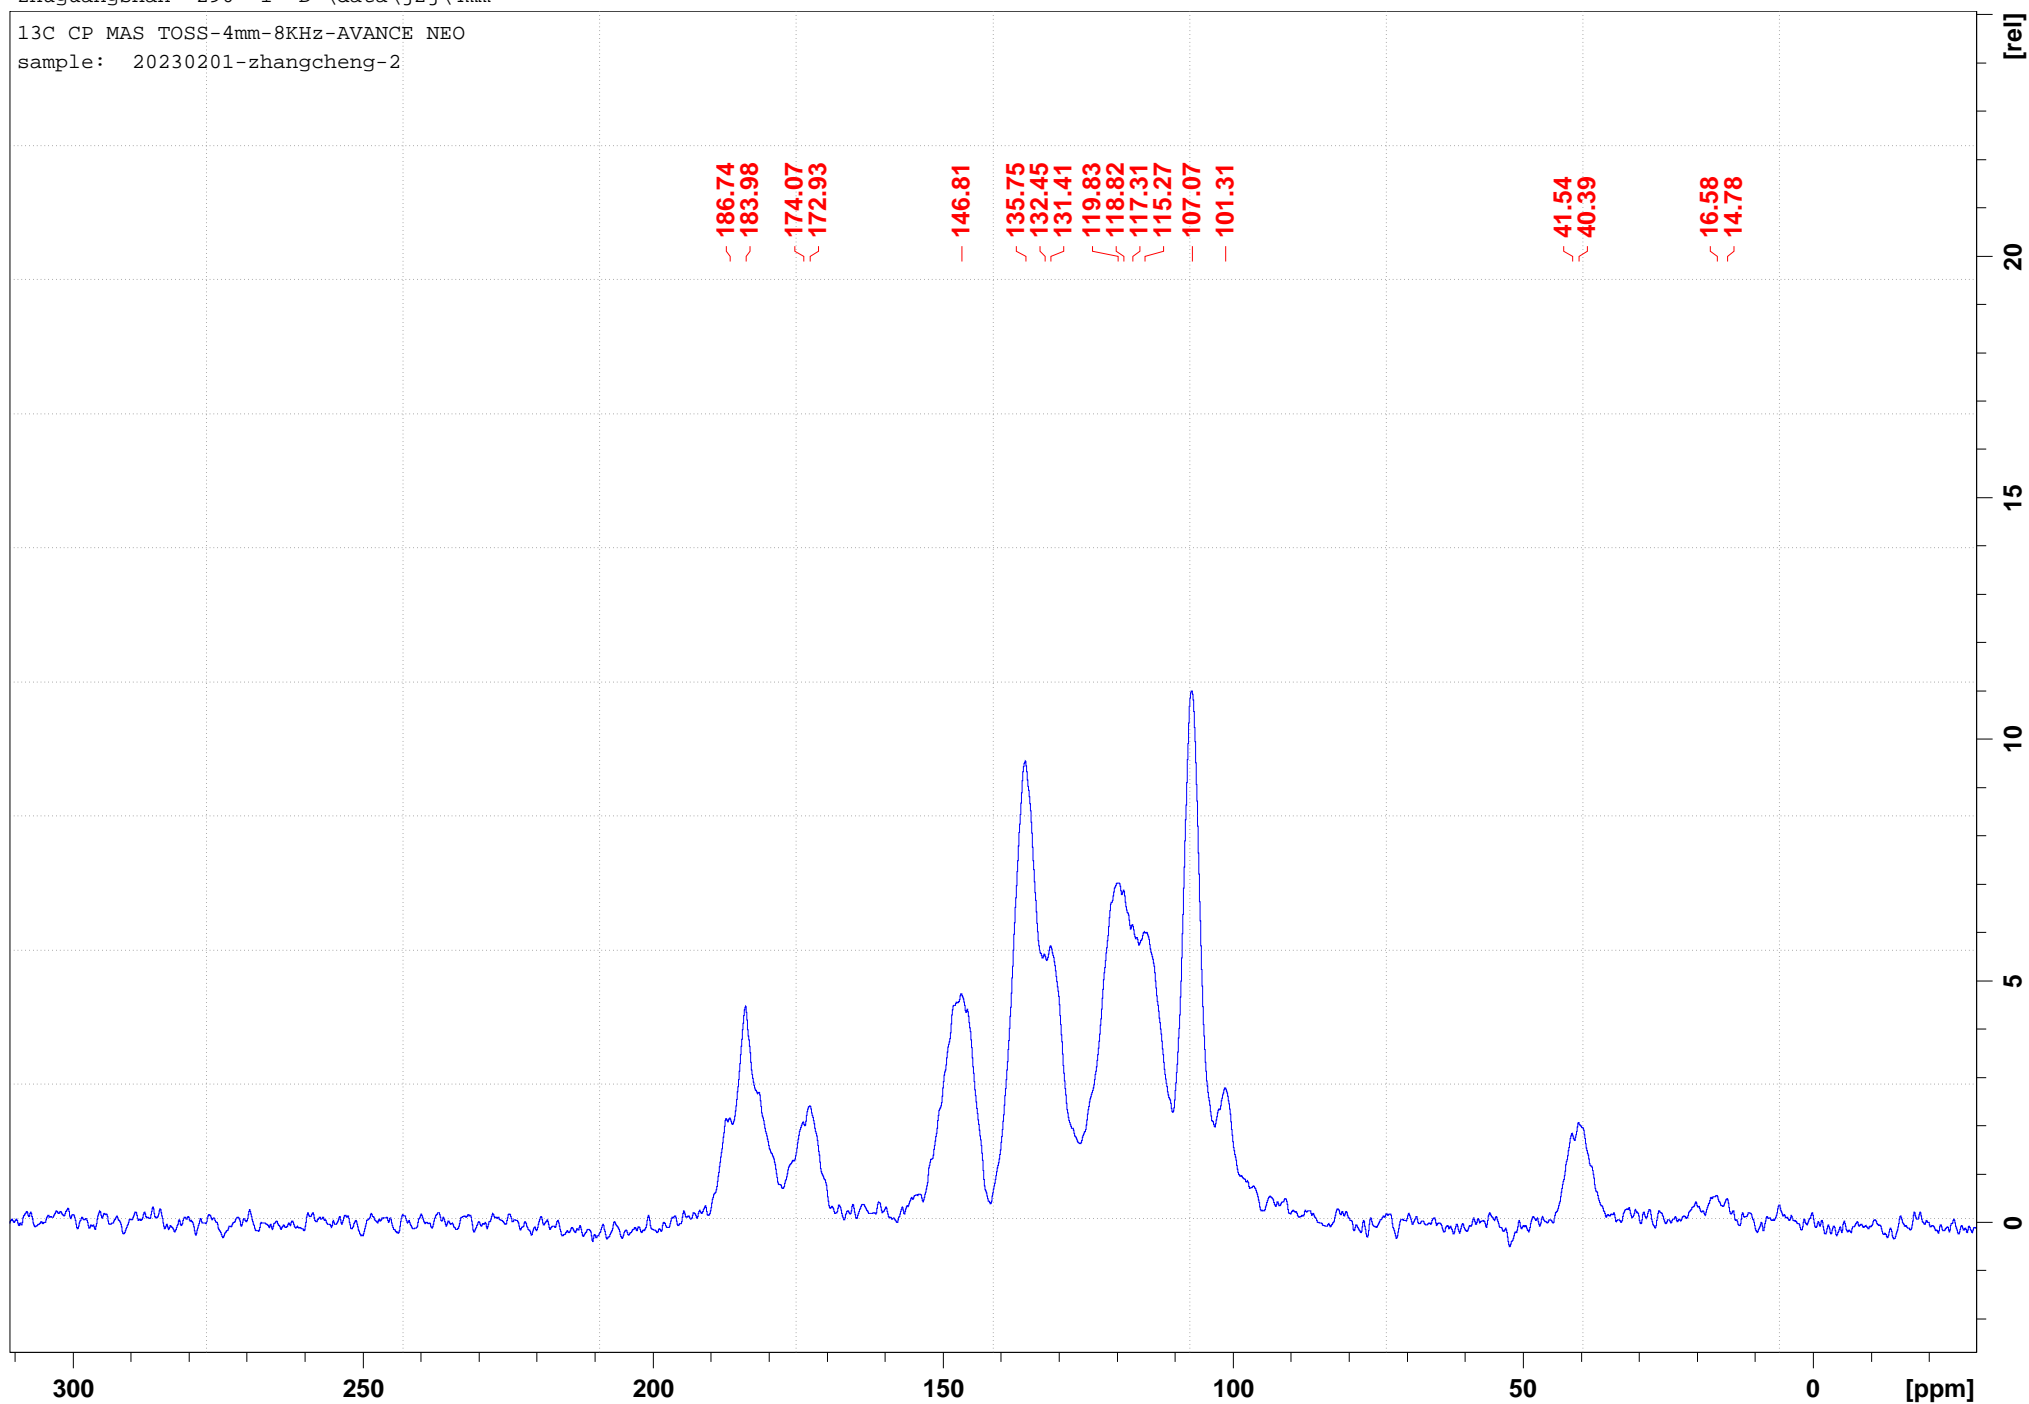

Supplement: Supplementary file 1 [file 39322388]
